# Supplementary material
Source: Springer Nature journal article supplement (https://www.springermedizin.de/resource/supplementary/12916_2009_225_MOESM2_ESM.pdf/9599434)

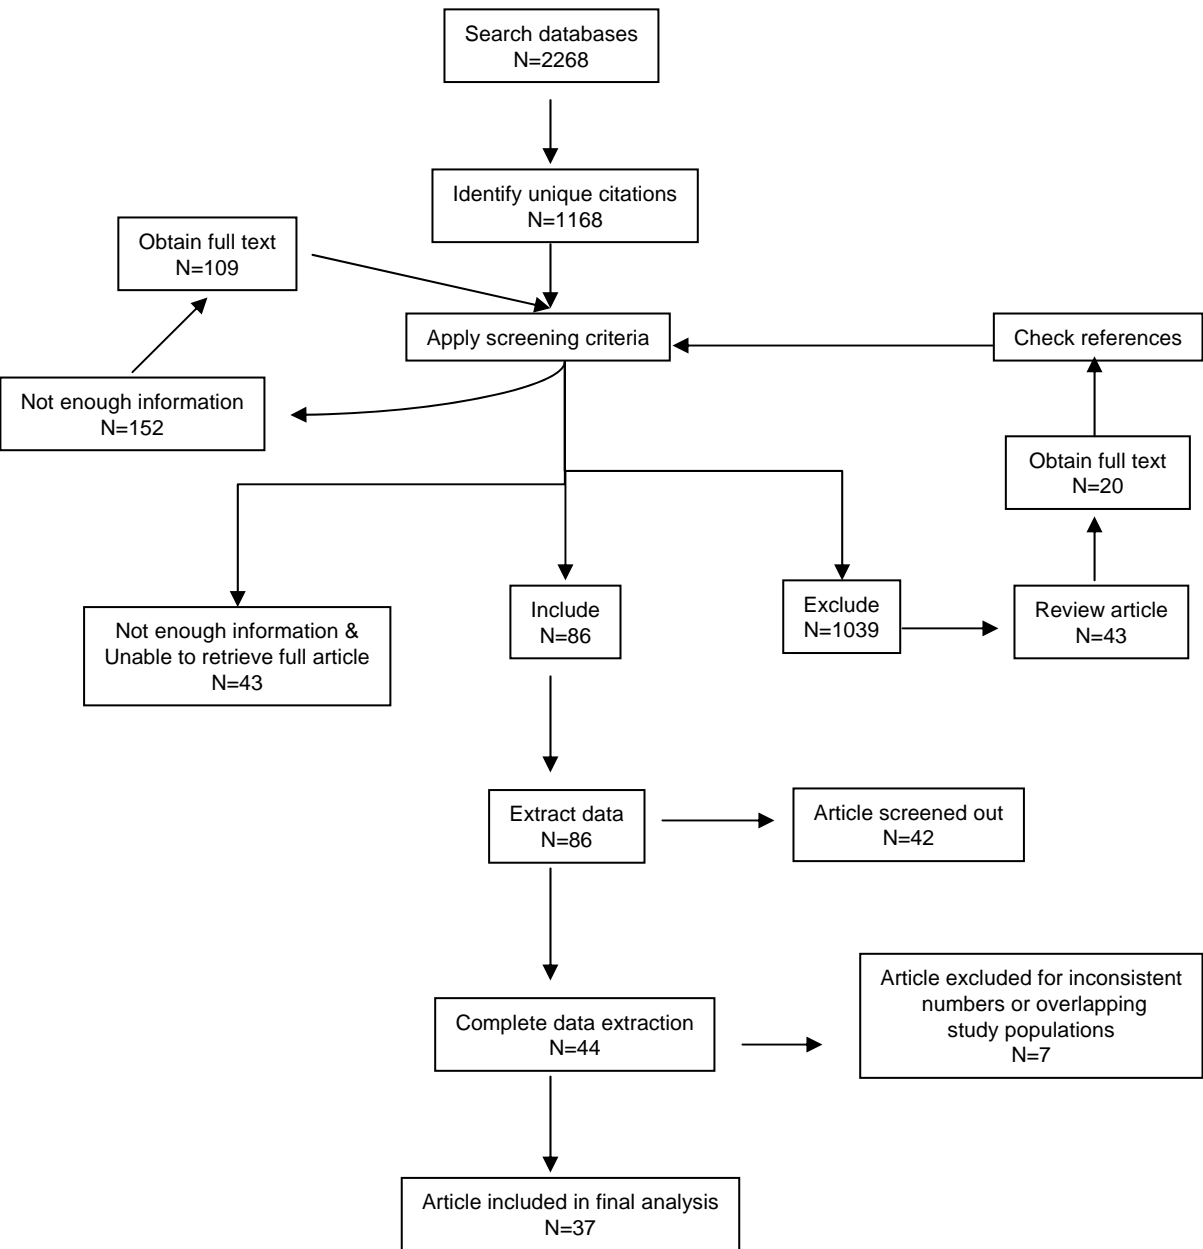

Supplement: MOESM2 [file 9599434]
